# Supplementary material for: A proteomics approach to study mouse long bones: examining baseline differences and mechanical loading-induced bone formation in young-adult and old mice
Source: publisher site journal article supplement (doi:10.18632/aging.206131), 2024-10-12
Supplement: Supplementary file [file aging-v16i19-206131-supplementary-material-SD2.pdf]

## SUPPLEMENTARY TABLE

Supplementary Table 1. RNAscope probes used.

| Target                   | Catalog #  | Notes                                                                    |
|--------------------------|------------|--------------------------------------------------------------------------|
| <i>Timp2</i>             | 567831     | –                                                                        |
| <i>Asrgl1</i>            | 1076841-C1 | 20ZZ probe custom designed to target Mm-Asrgl1 (256-1215 of NM_025610.3) |
| <i>Tgfb2</i>             | 406181     | –                                                                        |
| Pos Control: <i>Ubc</i>  | 310771     | –                                                                        |
| Neg Control: <i>DapB</i> | 310043     | –                                                                        |
